# Supplementary material for: Energy Use and Carbon Footprint of Wine and Winegrapes
Source: Research Square preprint supplement (doi:10.21203/rs.3.rs-7837088/v1), 2025-11-07
Supplement: Supplementary file 1 [file b6a9cc767c61e1722b83cd41.docx]

**Energy Use and Carbon Footprint of Wine and Winegrapes**

Vedat GÜNER1, Serhan CANDEMİR2

Department of Agricultural Economics, Faculty of Agriculture, Master's Student,

Malatya Turgut Ozal University, Malatya, Türkiye

(Orcid: 0009-0002-1831-8896)

2Department of Agricultural Economics, Faculty of Agriculture,

Malatya Turgut Özal University, Malatya, Türkiye

(Orcid: 0000-0003-4248-7024)

*Corresponding author’s e-mail: serhan.candemir@ozal.edu.tr

**Statements & Declarations**

**Funding:** The authors declare that no funds, grants, or other support were received during the preparation of this manuscript.

**Competing Interests:** The authors have no relevant financial or non-financial interests to disclose.

**Author Contributions**: All authors contributed to the study conception and design. Material preparation, data collection and analysis were performed by [Vedat GÜNER] and [Serhan CANDEMİR]. The first draft of the manuscript was written by [Serhan CANDEMİR] and all authors commented on previous versions of the manuscript. All authors read and approved the final manuscript.

**Data Availability:** Data may be provided upon reasonable request.

**Ethic statement:** Not applicable
